# Supplementary material
Source: publisher figshare collection journal article supplement (https://frontiersin.figshare.com/ndownloader/files/13059410)
Supplement: Supplementary file 1 [file 13059410]

Supplemental Table 1. Environmental variables retained in the final generalized additive model (GAM) describing presence/absence of tagged scalloped hammerheads. Model fit was assessed with Akaike’s Information Criterion (AIC) and % deviance explained (% DE). The relative importance of each predictor variable to the final model is given as the difference in model AIC (ΔAIC) and % DE (ΔDE) if this variable is removed from the final model.

| **Final Model** | **AIC = 3153.5 %DE = 33.5** | | |
| --- | --- | --- | --- |
| Variable | | ΔAIC | ΔDE |
| Chlorophyll *a* | | 55.8 | 0.8 |
| Depth | | 278.8 | 6.3 |
| Distance to artificial habitat | | 265.1 | 6.4 |
| Distance to hard bottom habitat | | 21.2 | 0.5 |
| ID (Random) | | 39.9 | 1.9 |
| Salinity | | 28.5 | 0.7 |
| SSHA | | 13.6 | 0.4 |
